# Supplementary material for: Nano-Lipids Based on Ginger Oil and Lecithin as a Potential Drug Delivery System
Source: MDPI journal article supplement (doi:10.3390/pharmaceutics14081654), 2022-08-09
Supplement: s1 [file s1]

# Nano-lipids based on ginger oil and lecithin as a potential drug delivery system

Hung Quach<sup>1</sup>, Tuong-Vi Le<sup>1</sup>, Thanh-Thuy Nguyen<sup>1,2</sup>, Phuong Nguyen<sup>3\*</sup>, Cuu Khoa Nguyen<sup>1,2\*</sup>, Le Hang Dang<sup>1,2\*</sup>

1 Institute of Applied Materials Science, Vietnam Academy of Science and Technology, HCMC, Viet Nam

2 Graduate University of Science and Technology, Vietnam Academy of Science and Technology, HCMC, Viet Nam

3 Faculty of Chemical Technology, HCMC University of Food Industry, Ho Chi Minh City, Viet Nam

\* Correspondence: nckhoa@iams.vast.vn ; ntphuong@iams.vast.vn; dtlhang@iams.vast.vn

## Supporting material

Table S1: Compounds identified by GC–MS using NIST-14 Mass Spectral library

Figure S1: Full GC spectrum of ginger oil.

Figure S2: Mass spectrum extracted from a peak 40.41 (A) and its fragmentation (B)

Figure S3: Mass spectrum extracted from a peak 41.45(A) and its fragmentation (B)

Figure S4: Mass spectrum extracted from a peak 43.88 (A) and its fragmentation (B)

Figure S5: Mass spectrum extracted from a peak 23.57 (A) and its fragmentation (B)

Figure S6: Standard curve of [6]-shogaol constructing by HPLC

Figure S7: The color of pyrogallol solution in the presentation of HEPES buffer, Ginger oil and GL nano-lipid

Figure S8: Zones of Inhibitions formed on nutrient agar surface by ginger oil, L nano-lipid, GL nano-lipid, and two positive controls (Ampicillin and Streptomycin) against *E.coli* (A) and *S.aureus* (B).

Figure S9: Hydrodynamic size value of Cur@ GL in PBS buffer and the EE values after 10 days stored at 25°C.

Figure S10: Release kinetics of Cur@ GL at pH 7.4 (A) and at pH 5.5 (B) fitted to 5 kinetic models constructing by KinetDS

**Table S1: Compounds identified by GC–MS using NIST-14 Mass Spectral library**

| Peak | R.T.   | Name of compound                       | Pct Total |
|------|--------|----------------------------------------|-----------|
| 1    | 23.584 | Geraniol                               | 1.949     |
| 2    | 37.032 | n.i                                    | 0.474     |
| 3    | 39.479 | n.i                                    | 1.378     |
| 4    | 40.138 | n.i                                    | 3.113     |
| 5    | 40.41  | (6)-Shogaol                            | 63.137    |
| 6    | 41.549 | [8]-Shogaol                            | 6.29      |
| 7    | 41.644 | n.i                                    | 5.09      |
| 8    | 42.449 | n.i                                    | 1.438     |
| 9    | 42.679 | n.i                                    | 5.671     |
| 10   | 43.871 | Geranyl oleate                         | 3.735     |
| 11   | 45.544 | [6]-Gingerdiol (2E)-geranial<br>acetal | 7.726     |

**Figure list**

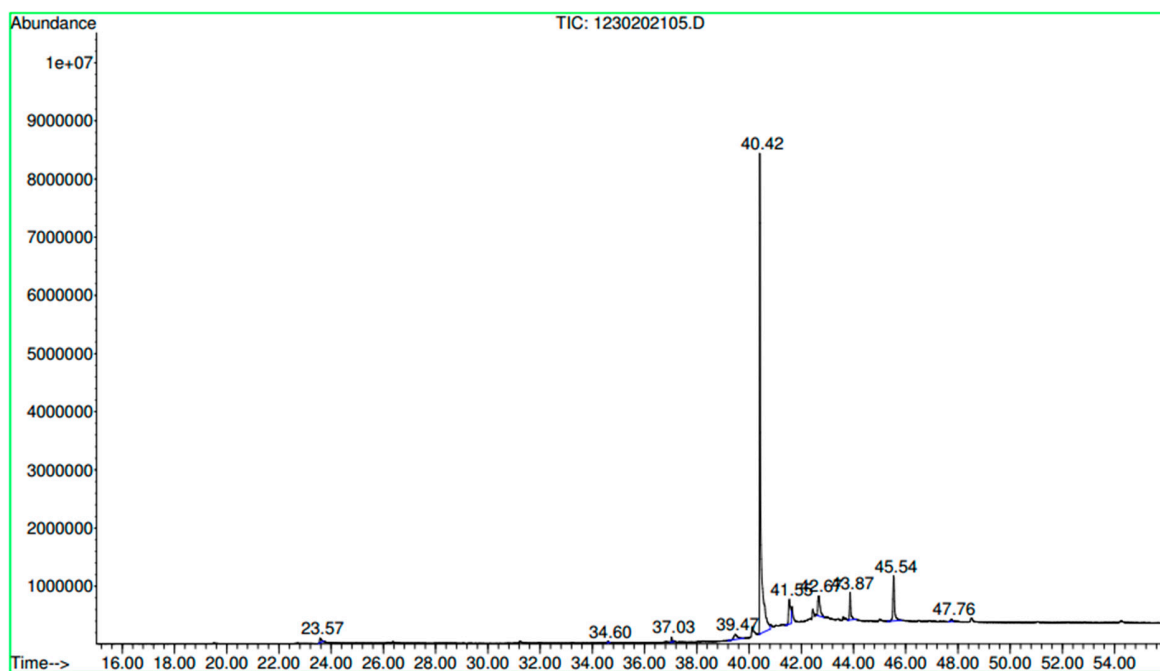

**Figure S1: Full GC spectrum of ginger oil**

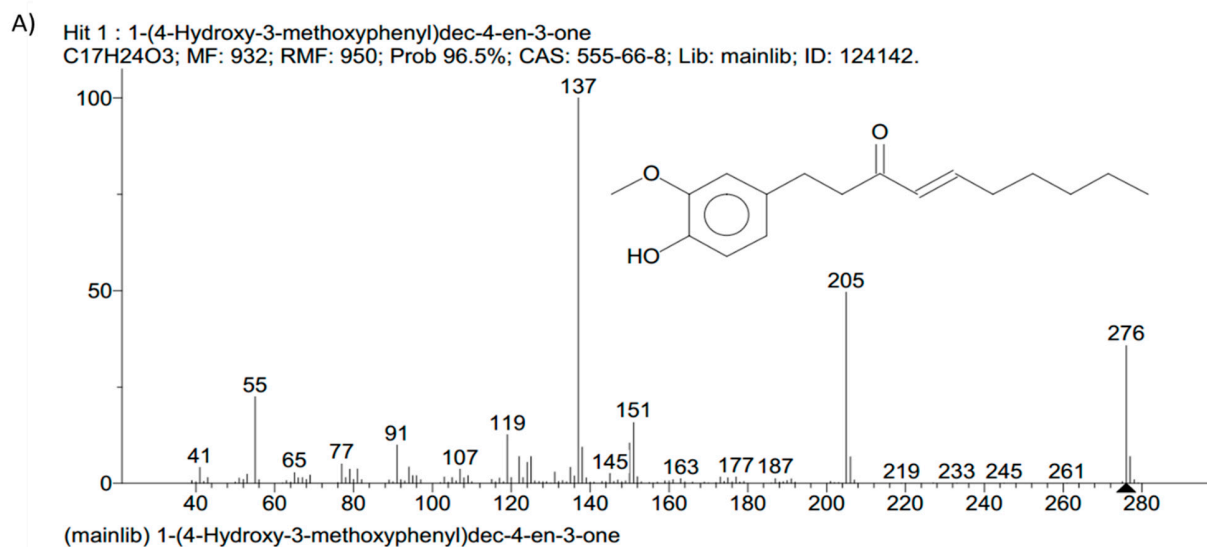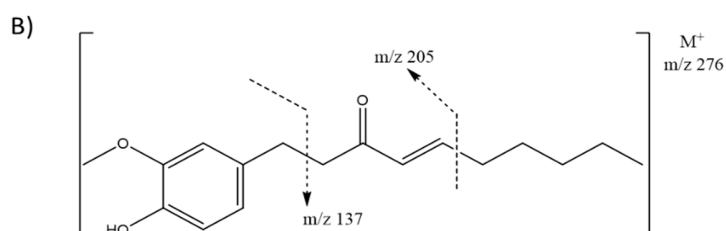

Figure S2: Mass spectrum extracted from a peak 40.41 (A) and its fragmentation (B)

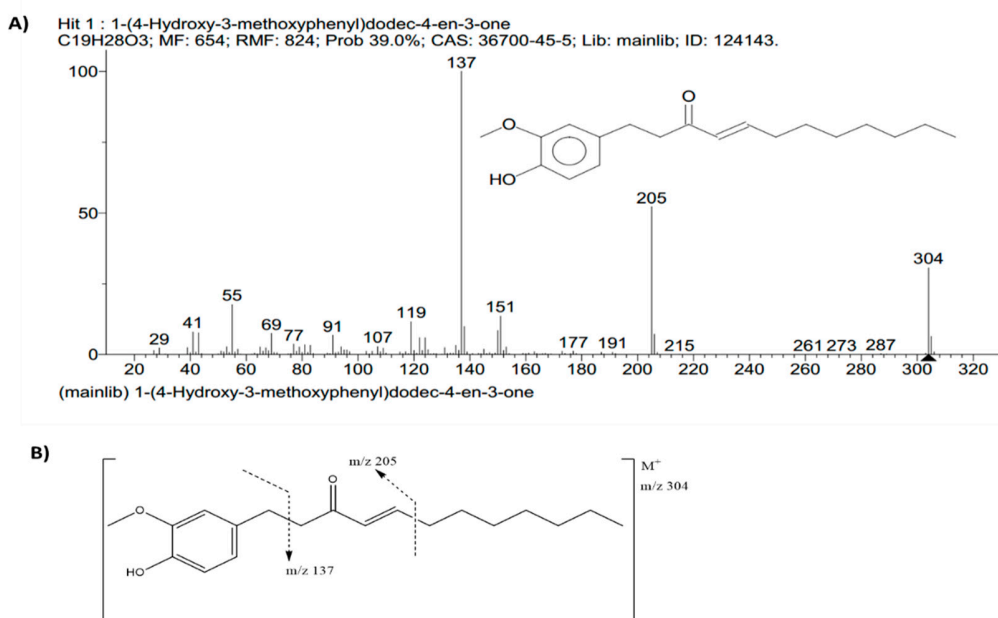

Figure S3: Mass spectrum extracted from a peak 41.45(A) and its fragmentation (B)

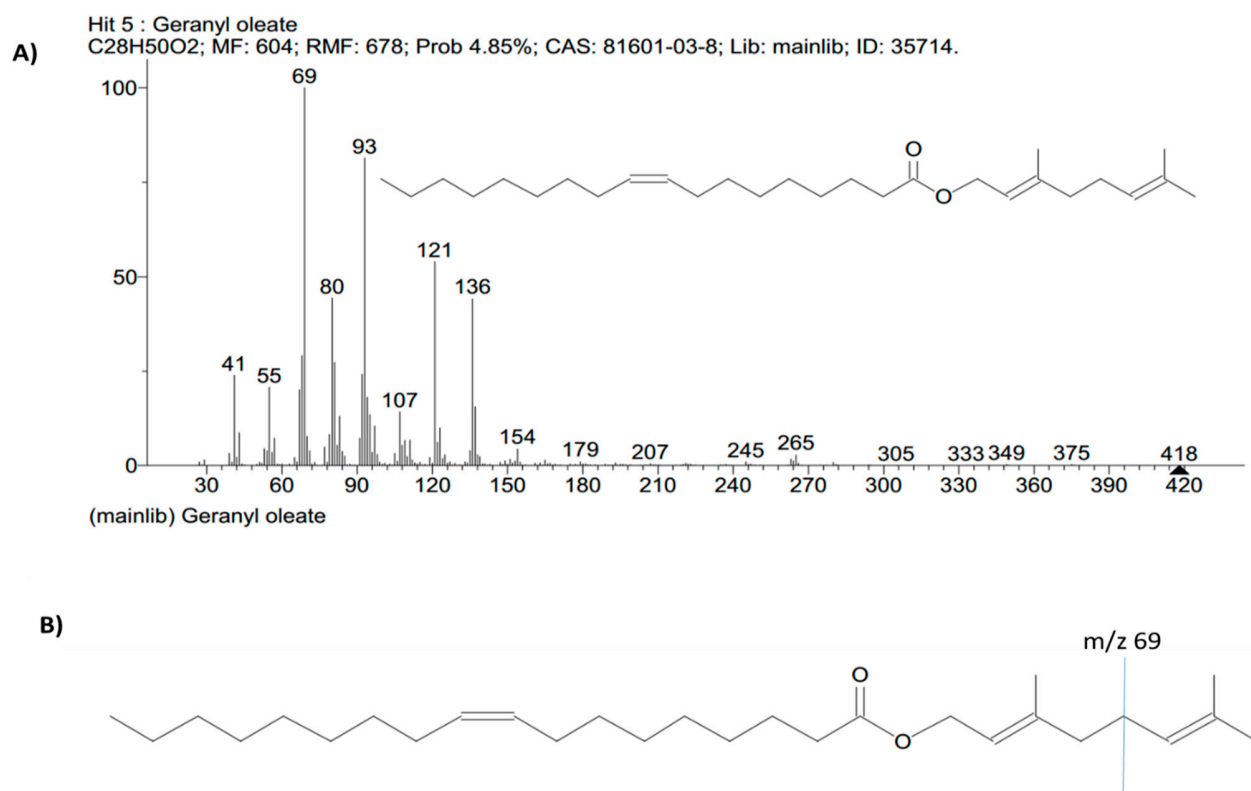

Figure S4: Mass spectrum extracted from a peak 43.88 (A) and its fragmentation (B)

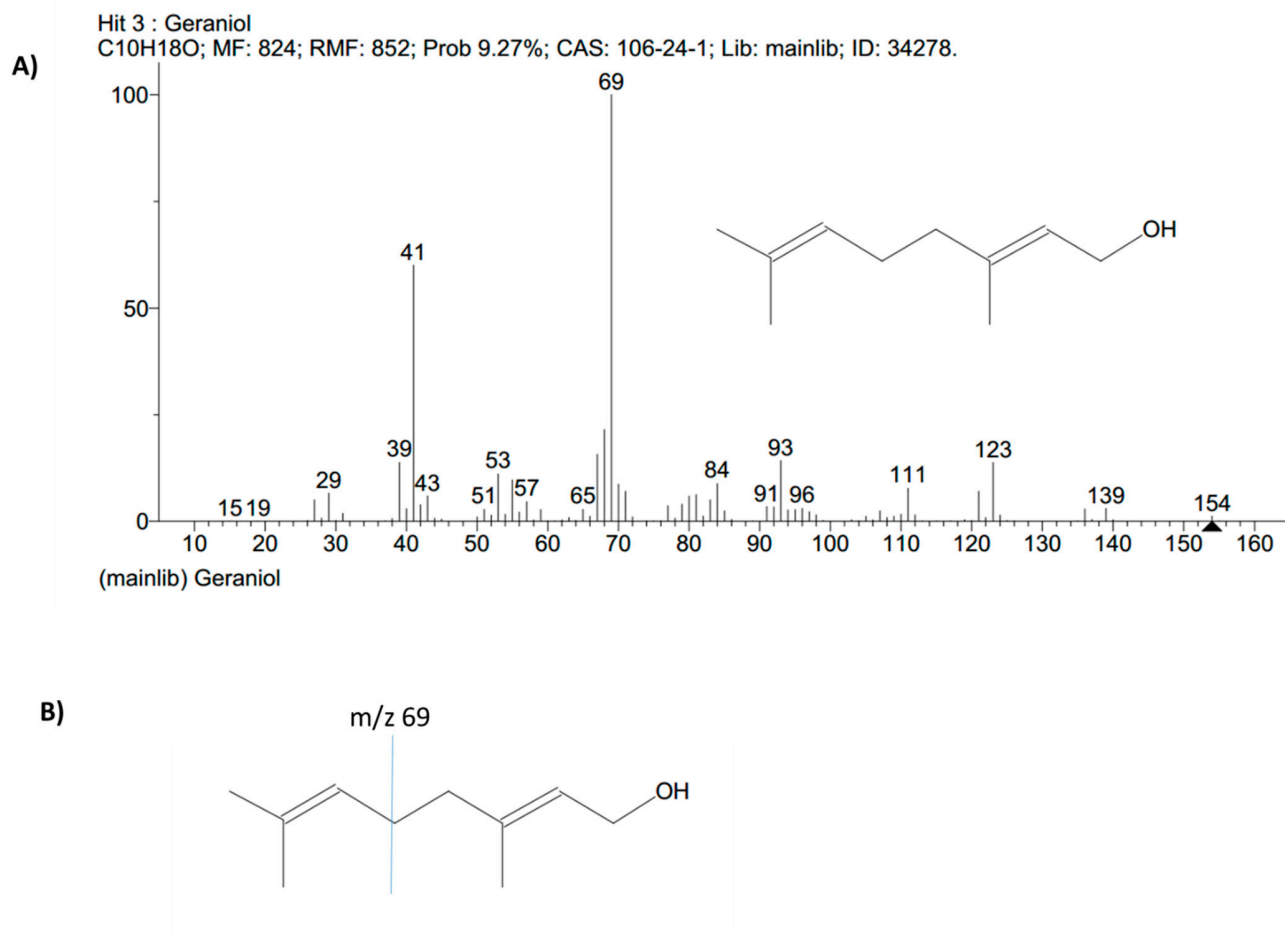

Figure S5: Mass spectrum extracted from a peak 23.57 (A) and its fragmentation (B)

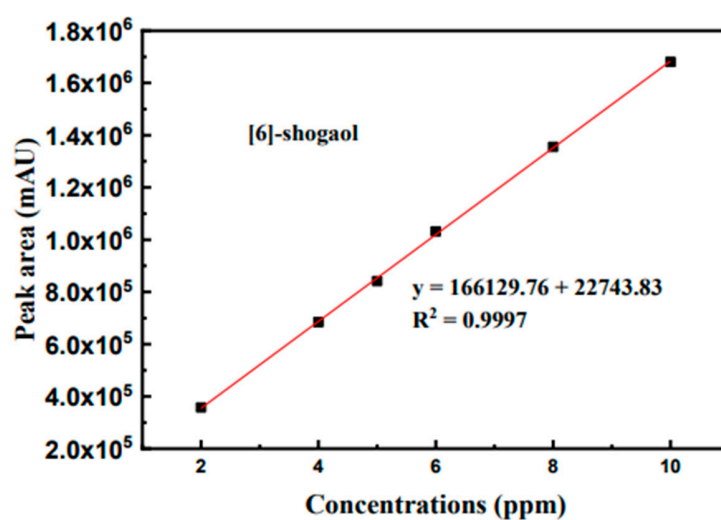

Figure S6: Standard curve of [6]-shogaol constructing by HPLC

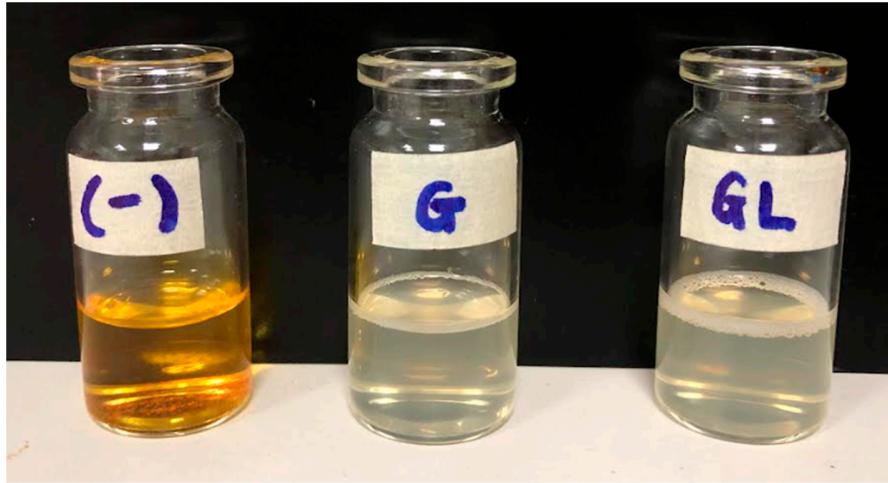

Figure S7: The color of pyrogallol solution in the presentation of HEPES buffer, Ginger oil and GL nano-lipid

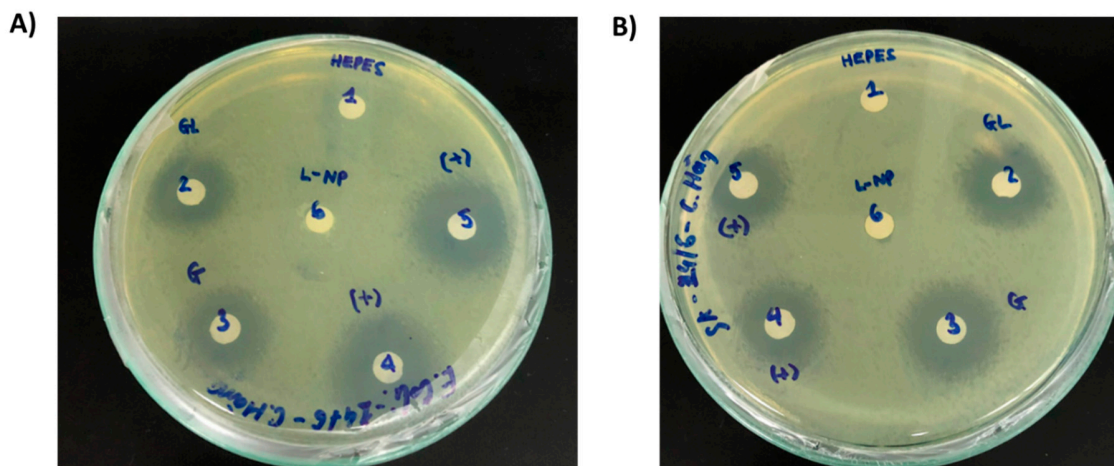

Figure S8: Zones of Inhibitions formed on nutrient agar surface by Hepes (1) GL nano-lipid (2), ginger oil (3), and two positive controls (Ampicillin (4) and Streptomycin(5)) L nano-lipid (6) against *E.coli* (A) and *S.aureus* (B).

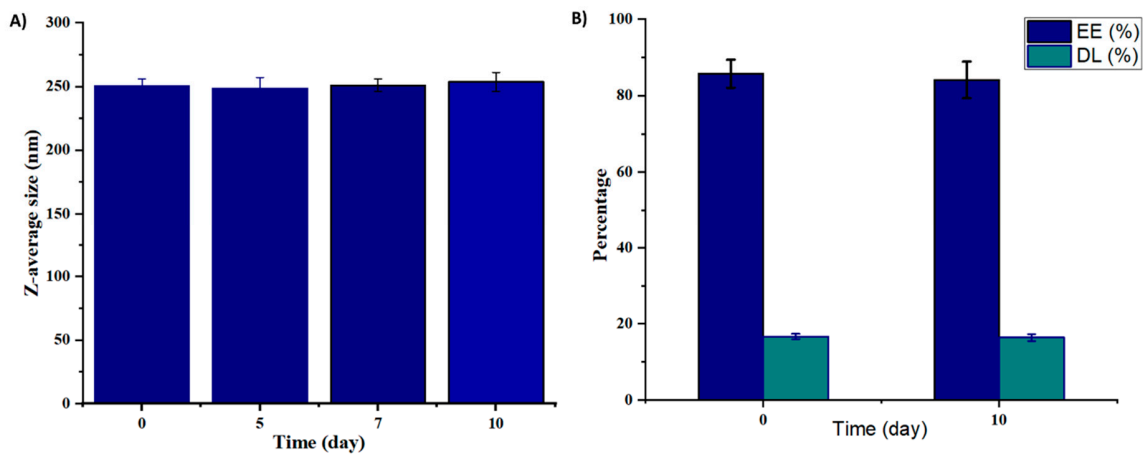

Figure S9: Hydrodynamic size value of Cur@ GL in PBS buffer (A) and the EE and DL values (B) after 10 days stored at 25°C.

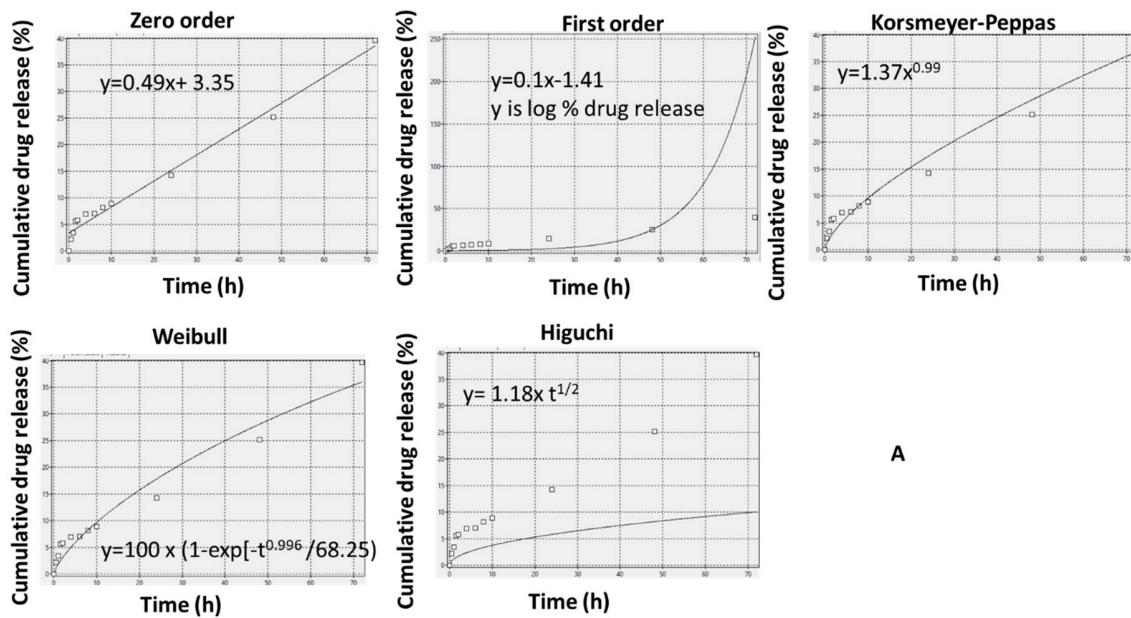

A

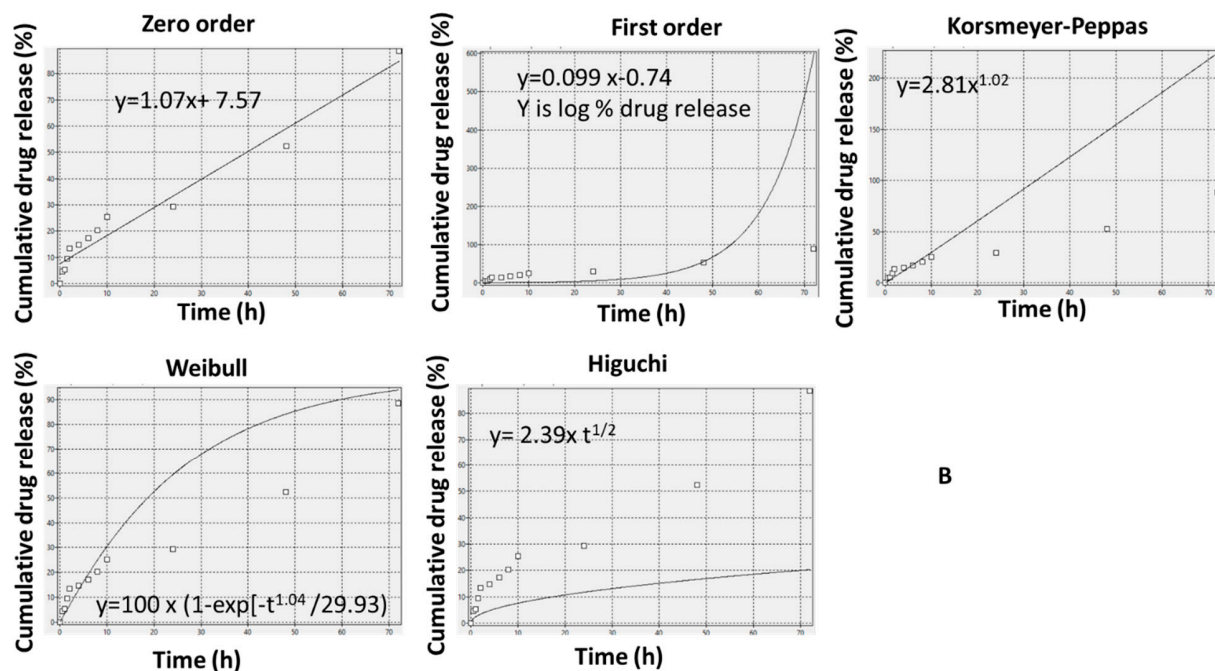

Figure S10: Release kinetics of Cur@ GL at pH 7.4 (A) and at pH 5.5 (B) fitted to 5 kinetic models constructing by KinetDS
